# Supplementary material for: Support vector machine prediction of obstructive sleep apnea in a large-scale Chinese clinical sample
Source: PubMed Central journal article supplement — Sleep. 2020 Jan 9;43(7):zsz295. doi: 10.1093/sleep/zsz295 (PMC7355399; doi:10.1093/sleep/zsz295), 2020-01-09
Supplement: zsz295_suppl_supplementary_material.pdf [file zsz295_suppl_supplementary_material.pdf]

# **Support Vector Machine Prediction of Obstructive Sleep Apnea in a Large-Scale Chinese Clinical Sample**

Wen-Chi Huang M.S<sup>#</sup>, Pei-Lin Lee M.D., PhD<sup>#\*</sup>, Yu-Ting Liu Ph.D., Ambrose A. Chiang M.D., and Fei-Pei Lai Professor\*

## **Supplemental material**

1. Table S1
2. Table S2
3. Table S3
4. Table S4
5. Table S5 (Supplementary Excel). Results of Forward stepwise feature selection. Feature marked in yellow was selected in each iteration. Features included in the red rectangle were used for SVM training.
6. Table S6
7. Table S7
8. Figure S1
9. Figure S2
10. Reference

**Table S1.** Summary of published OSA prediction models

(A) Key information

| Author year          | Source | Training set |           |         | Validation set |           |          |                                                                              |                                                                                      |                                                                                  |                                                                                      |                                                                                    |                                                                                      |                                                                                      |
|----------------------|--------|--------------|-----------|---------|----------------|-----------|----------|------------------------------------------------------------------------------|--------------------------------------------------------------------------------------|----------------------------------------------------------------------------------|--------------------------------------------------------------------------------------|------------------------------------------------------------------------------------|--------------------------------------------------------------------------------------|--------------------------------------------------------------------------------------|
|                      |        | No.          | Age (y/o) | Man (%) | No..           | Age (y/o) | Male (%) | AHI cutoff (/hr)                                                             | Preva (%)                                                                            | AUROC                                                                            | Sen (%)                                                                              | Spec (%)                                                                           | PPV (%)                                                                              | NPV (%)                                                                              |
| Kirby 1999 [1]       | S      | 405          | 47.2      | 72.3    | 150            | 51        | 66       | ≥10                                                                          | 65.00                                                                                | 0.94                                                                             | 98.90                                                                                | 80.00                                                                              | 88.10                                                                                | 98.00                                                                                |
| Rowley 2000 [2]      | S      | 370          | 46.5      | 51.6    | 370            | 46.5      | 51.6     | <sup>1</sup> ≥10<br><sup>2</sup> ≥20                                         | <sup>1</sup> 67.02<br><sup>2</sup> 48.65                                             | <sup>1</sup> 0.67-0.74<br><sup>2</sup> 0.70-0.76                                 | <sup>1</sup> 76-96<br><sup>2</sup> 33-39                                             | <sup>1</sup> 13-54<br><sup>2</sup> 87-93                                           | <sup>1</sup> 66-77<br><sup>2</sup> 72-85                                             | N/A                                                                                  |
| Rodsutti 2004 [3]    | S      | 837          | N/A       | 68.2    | 243            | 51.0      | 63.0     | ≥5                                                                           | 72.02                                                                                | 0.79                                                                             | 100.00                                                                               | 30.88                                                                              | 80.66                                                                                | 84.50                                                                                |
| Sharma 2006 [4]      | S      | 102          | N/A       | 68.6    | 104            | NA        | 77.9     | ≥15                                                                          | 48.08                                                                                | NA                                                                               | 82.00                                                                                | 90.70                                                                              | 89.13                                                                                | 84.50                                                                                |
| Takegami 2009 [5]    | S      | 307          | 49.9      | 66.1    | 308            | 43.8      | 99.0     | <sup>1</sup> ≥15*<br><sup>2</sup> ≥30                                        | <sup>1</sup> 22.40<br><sup>2</sup> 6.81                                              | <sup>1</sup> 0.78<br><sup>2</sup> 0.85                                           | <sup>1</sup> 73.9<br><sup>2</sup> 95.2                                               | <sup>1</sup> 66.1<br><sup>2</sup> 61.00                                            | <sup>1</sup> 38.62<br><sup>2</sup> 93.09                                             | <sup>1</sup> 89.77<br><sup>2</sup> 85.62                                             |
| Caffo 2010 [6]       | C      | 4,147        | N/A       | N/A     | 1,383          | 65.0      | 47.3     | ≥7*                                                                          | 37.80                                                                                | 0.75                                                                             | 66.00                                                                                | 70.00                                                                              | 57.00                                                                                | 77.21                                                                                |
| Bouloukaki 2011 [7]  | S      | 538          | N/A       | N/A     | 2,690          | 50.7      | 79       | ≥15                                                                          | 79.00                                                                                | 0.78                                                                             | 70.00                                                                                | 73.10                                                                              | 81.00                                                                                | 62.00                                                                                |
| Zou 2013 [8]         | S      | 2032         | 43        | 82.4    | 784            | 41.0      | 83.2     | ≥5                                                                           | 83.80                                                                                | I:0.84<br>II:0.98                                                                | I:86.91<br>II:94.22                                                                  | I:74.80<br>II:85.83                                                                | I:94.69<br>II:97.17                                                                  | I:52.49<br>II:74.15                                                                  |
| Marti-Soler 2016 [9] | C      | 2,121        | 59.0      | 48.0    | 1,042          | 42.0      | 45.0     | >20                                                                          | 11.52                                                                                | 0.74                                                                             | 85.00                                                                                | 77.001                                                                             | 33.0                                                                                 | 98.0                                                                                 |
| Shah 2016 [10]       | C      | 12,158       | 48.1      | 39.4    | 12,158         | 48.1**    | 39.4     | ≥15                                                                          | 9.02                                                                                 | 0.83                                                                             | 77.00                                                                                | 75.00                                                                              | 23.39                                                                                | 97.05                                                                                |
| Ustun 2016 [11]      | S      | 1,922        | 50.2      | 58.7    | 1,922          | 50.2      | 58.7     | >5 or >10 *                                                                  | 76.90                                                                                | <sup>1</sup> 0.77<br><sup>2</sup> 0.79                                           | <sup>1</sup> 82.80<br><sup>2</sup> 83.20                                             | <sup>1</sup> 56.20<br><sup>2</sup> 58.90                                           | <sup>1</sup> 86.29<br><sup>2</sup> 87.08                                             | <sup>1</sup> 49.53<br><sup>2</sup> 51.29                                             |
| Liu 2017 [12]        | S      | 5,245        | 45.3      | 76.3    | 1,154          | 47.4      | 70.7     | <sup>1</sup> ≥15<br><sup>2</sup> ≥30                                         | <sup>1</sup> 61.87<br><sup>2</sup> 44.04                                             | N/A                                                                              | <sup>1</sup> 68.35<br><sup>2</sup> 68.32                                             | <sup>1</sup> 82.55<br><sup>2</sup> 79.85                                           | <sup>1</sup> 86.40<br><sup>2</sup> 64.99                                             | <sup>1</sup> 61.65<br><sup>2</sup> 77.45                                             |
| Shin 2017 [13]       | SW     | 108,781      | 54.4      | 44.4    | 108,781        | 54.4      | 44.4     | >5                                                                           | 2.08                                                                                 | 0.82                                                                             | 72.30                                                                                | 76.20                                                                              | 6.06                                                                                 | 99.23                                                                                |
| Tan 2017 [14]        | C      | N/A          | N/A       | N/A     | 242            | 48.3      | 50.4     | <sup>1</sup> ≥15<br><sup>2</sup> ≥20<br><sup>3</sup> ≥25<br><sup>3</sup> ≥30 | <sup>1</sup> 28.10<br><sup>2</sup> 20.20<br><sup>3</sup> 14.50<br><sup>3</sup> 10.70 | <sup>1</sup> 0.70<br><sup>2</sup> 0.74<br><sup>3</sup> 0.73<br><sup>3</sup> 0.71 | <sup>1</sup> 60.30<br><sup>2</sup> 69.40<br><sup>3</sup> 71.40<br><sup>3</sup> 69.20 | <sup>1</sup> 79.70<br><sup>2</sup> 78.20<br><sup>3</sup> 75.4<br><sup>3</sup> 73.1 | <sup>1</sup> 53.90<br><sup>2</sup> 44.70<br><sup>3</sup> 32.90<br><sup>3</sup> 23.70 | <sup>1</sup> 83.70<br><sup>2</sup> 91.00<br><sup>3</sup> 94.00<br><sup>3</sup> 95.20 |
| Traxdorf 2017 [15]   | S      | 60           | 48.8      | 81.7    | 100            | 48.1      | 76.0     | <sup>1</sup> ≥5<br><sup>2</sup> ≥15<br><sup>3</sup> ≥30                      | <sup>1</sup> 70.00<br><sup>2</sup> 55.50<br><sup>3</sup> 26.00                       | N/A                                                                              | <sup>1</sup> 94.30<br><sup>2</sup> 92.70<br><sup>3</sup> 92.30                       | <sup>1</sup> 50.00<br><sup>2</sup> 33.30<br><sup>3</sup> 22.90                     | <sup>1</sup> 81.50<br><sup>2</sup> 62.90<br><sup>3</sup> 29.60                       | <sup>1</sup> 78.90<br><sup>2</sup> 78.90<br><sup>3</sup> 89.50                       |
| Duarte 2018 [16]     | S      | 2,037        | 45.0      | 55.9    | 2,035          | 44.0      | 53.2     | <sup>1</sup> ≥5                                                              | <sup>1</sup> 76.40                                                                   | <sup>1</sup> 0.78                                                                | <sup>1</sup> 83.10                                                                   | <sup>1</sup> 58.20                                                                 | <sup>1</sup> 86.50                                                                   | <sup>1</sup> 51.60                                                                   |

|               |   |       |      |      |       |      |      |                          |                      |                     |                      |                      |                      |                      |
|---------------|---|-------|------|------|-------|------|------|--------------------------|----------------------|---------------------|----------------------|----------------------|----------------------|----------------------|
|               |   |       |      |      |       |      |      | <sup>2</sup> . $\geq 15$ | <sup>2</sup> . 54.70 | <sup>2</sup> . 0.76 | <sup>2</sup> . 88.70 | <sup>2</sup> . 45.30 | <sup>2</sup> . 66.20 | <sup>2</sup> . 76.80 |
|               |   |       |      |      |       |      |      | <sup>3</sup> . $\geq 30$ | <sup>3</sup> . 35.80 | <sup>3</sup> . 0.75 | <sup>3</sup> . 91.50 | <sup>3</sup> . 36.80 | <sup>3</sup> . 44.60 | <sup>3</sup> . 88.60 |
| Present study | S | 6,875 | 47.8 | 76.0 | 6,875 | 47.8 | 76.0 | <sup>1</sup> . $\geq 5$  | <sup>1</sup> . 82.47 | <sup>1</sup> . 0.82 | <sup>1</sup> . 74.90 | <sup>1</sup> . 73.97 | <sup>1</sup> . 93.14 | <sup>1</sup> . 38.56 |
|               |   |       |      |      |       |      |      | <sup>2</sup> . $\geq 15$ | <sup>2</sup> . 61.26 | <sup>2</sup> . 0.80 | <sup>2</sup> . 76.21 | <sup>2</sup> . 68.66 | <sup>2</sup> . 79.36 | <sup>2</sup> . 64.63 |
|               |   |       |      |      |       |      |      | <sup>3</sup> . $\geq 30$ | <sup>3</sup> . 40.60 | <sup>3</sup> . 0.78 | <sup>3</sup> . 70.65 | <sup>3</sup> . 70.06 | <sup>3</sup> . 61.97 | <sup>3</sup> . 78.23 |

**(B)** Algorithm and feature details

| Author year          | Algorithm | Feature no.                           | Feature detail                                                                                                                                                                                                                                                                                                                                      |
|----------------------|-----------|---------------------------------------|-----------------------------------------------------------------------------------------------------------------------------------------------------------------------------------------------------------------------------------------------------------------------------------------------------------------------------------------------------|
| Kirby 1999 [1]       | GRNN      | 23                                    | Age, gender, frequent awakening, witnessed apnea, observed choking, excessive daytime sleepiness, ESS, HTN, alcohol consumption, smoking (pack-year), height, weight, BMI, SBP $\geq$ 140, DBP $\geq$ 90, tonsillar enlargement, soft palate enlargement, crowding of the oral pharynx, sum of the clinical score for the binary categorical values |
| Rowley 2000 [2]      | LR        | 4-6                                   | Witnessed apnea, HTN, BMI, age, gender, snoring, gasping, neck                                                                                                                                                                                                                                                                                      |
| Rodsutti 2004 [3]    | LR        | 5                                     | Age, sex, BMI, snoring, witnessed apnea                                                                                                                                                                                                                                                                                                             |
| Sharma 2006 [4]      | LR        | 4                                     | Gender, BMI, snoring index, choking index                                                                                                                                                                                                                                                                                                           |
| Takegami 2009 [5]    | LR        | 4                                     | Gender, BP, BMI, snoring                                                                                                                                                                                                                                                                                                                            |
| Caffo 2010 [6]       | Boosting  | 10                                    | Neck circumference, BMI, age, snoring frequency, waist circumference, snoring loudness, gender, SOL, response to “What is the chance that you would doze off or fall asleep while sitting and reading?”, and presence or absence of a heart attack.                                                                                                 |
| Bouloukaki 2011 [7]  | LR        | 4                                     | Gender, EDS, neck circumference, and BMI                                                                                                                                                                                                                                                                                                            |
| Zou 2013 [8]         | LR        | I. 5<br>II. 4                         | I. Age, BMI, waist circumference, gender<br>II. Age, waist circumference, ESS score, and minimum oxygen saturation (SaO <sub>2</sub> )                                                                                                                                                                                                              |
| Marti-Soler 2016 [9] | LR        | 5                                     | Neck circumference, BMI, snoring, age, and gender                                                                                                                                                                                                                                                                                                   |
| Shah 2016 [10]       | LR        | 4                                     | Gender, age, BMI, and snoring frequency                                                                                                                                                                                                                                                                                                             |
| Ustun 2016 [11]      | SLIM      | <sup>1</sup> . 5<br><sup>2</sup> . 10 | <sup>1</sup> . Age, HTN, BMI, and gender<br><sup>2</sup> . Age, BMI, DM, HTN, smoker, and gender                                                                                                                                                                                                                                                    |
| Liu 2017 [12]        | SVM       | 4                                     | BMI, neck circumference, waist circumference, and age                                                                                                                                                                                                                                                                                               |
| Shin 2017 [13]       | LR        | 14                                    | BMI, ASA score, age, dyslipidemia, chronic pulmonary disease, liver disease, HTN, CHF, pulmonary HTN, AF, DM, CAD, and hemiplegia/paraplegia                                                                                                                                                                                                        |
| Tan 2017 [14]        | LR        | 5                                     | Neck circumference, BMI, snoring, age, and gender                                                                                                                                                                                                                                                                                                   |
| Traxdorf 2017 [15]   | LR        | 5                                     | ESS score, age, gasping, cardiovascular risk factors (e.g. CHF, CAD, myocardial infarction, AF, stroke), and witnessed apneas                                                                                                                                                                                                                       |
| Duarte 2018 [16]     | LR        | 2                                     | Neck circumference, and age                                                                                                                                                                                                                                                                                                                         |
| <b>Present study</b> | SVM       | <sup>1</sup> . 2<br><sup>2</sup> . 6  | <sup>1</sup> . Waist, and age<br><sup>2</sup> . Waist, age, snoring, neck circumference, witnessed apnea, and SOL <30 min                                                                                                                                                                                                                           |

|  |  |     |                                                                              |
|--|--|-----|------------------------------------------------------------------------------|
|  |  | 3.6 | 3. Waist, witnessed apnea, age, neck circumference, snoring, and SOL <30 min |
|--|--|-----|------------------------------------------------------------------------------|

\* respiratory disturbance index.

Abbreviations: S: sleep clinic; C, community; SW, surgical ward; GRNN, generalized regression neural network; Acc, accuracy; Sen, sensitivity; Spec, specificity; OSA, obstructive sleep apnea; AHI, apnea-hypopnea index; N/A, not available; LR, logistic regression; SLIM, Supersparse Linear Integer Model; SVM, support vector machine; SBP, systolic blood pressure; DBP, diastolic blood pressure; ESS, Epworth Sleepiness Scale; HTN, hypertension; SOL, sleep onset latency; EDS, excessive daytime sleepiness; DM, diabetes mellitus; ASA: American Society of Anesthesiologists; CHF, congestive heart failure; AF, atrial fibrillation; CAD, coronary artery disease;

**Table S2.** Comparison of the clinical features of subgroups categorized by gender and age

| Feature name                              | Male (N=5223) | Female (N=1652) | P      | Age <65 (N=5985) | Age ≥65 (N=890) | P      |
|-------------------------------------------|---------------|-----------------|--------|------------------|-----------------|--------|
| Age (y/o)                                 | 47.2±14.3     | 49.7±15.2       | <0.001 | 44.3±11.8        | 71.7±6.0        | <0.001 |
| Man, n (%)                                | -             | -               | -      | 4580 (76.5)      | 643 (72.2)      | 0.006  |
| BMI (kg/m2)                               | 27.4±4.8      | 25.4±5.2        | <0.001 | 27.1±5.1         | 26.0±4.1        | <0.001 |
| Neck circumference (cm)                   | 39.0±3.4      | 33.6±3.4        | <0.001 | 37.8±4.1         | 37.3±4.1        | 0.002  |
| Waist circumference (cm)                  | 94.1±12.0     | 82.7±12.5       | <0.001 | 91.3±13.2        | 91.9±11.5       | 0.046  |
| Current smoker, n (%)                     | 1029 (19.7)   | 75 (4.5)        | <0.001 | 1045 (17.5)      | 59 (6.6)        | <0.001 |
| Alcohol consumption, n (%)                | 648 (12.4)    | 40 (2.4)        | <0.001 | 618 (10.3)       | 70 (7.9)        | 0.022  |
| Hypnotic, n (%)                           | 383 (7.3)     | 251 (15.2)      | <0.001 | 450 (7.5)        | 184 (20.7)      | <0.001 |
| Comorbidity                               |               |                 |        |                  |                 |        |
| Hypertension, n (%)                       | 1623 (31.1)   | 398 (24.1)      | <0.001 | 1498 (25)        | 523 (58.8)      | <0.001 |
| Diabetes, n (%)                           | 431 (8.3)     | 149 (9)         | 0.328  | 391 (6.6)        | 184 (20.7)      | <0.001 |
| CAD, n (%)                                | 207 (4.0)     | 41 (2.5)        | 0.005  | 159 (2.7)        | 89 (10.0)       | <0.001 |
| CHF, n (%)                                | 79 (1.5)      | 22 (1.3)        | 0.594  | 47 (0.8)         | 54 (6.1)        | <0.001 |
| CVA, n (%)                                | 98 (1.9)      | 26 (1.6)        | 0.421  | 73 (1.2)         | 51 (5.7)        | <0.001 |
| COPD, n (%)                               | 53 (1.0)      | 14 (0.8)        | 0.546  | 31 (0.5)         | 36 (4.0)        | <0.001 |
| Asthma, n (%)                             | 336 (6.4)     | 154 (9.3)       | <0.001 | 412 (6.9)        | 78 (8.8)        | 0.050  |
| Hypothyroidism, n (%)                     | 72 (1.4)      | 84 (5.1)        | <0.001 | 110 (1.8)        | 46 (5.2)        | <0.001 |
| Sleep History                             |               |                 |        |                  |                 |        |
| Habitual SOL (min)                        | 18.9±18.6     | 27.3±31.1       | <0.001 | 19.8±20.8        | 28.3±31.1       | <0.001 |
| Habitual SOL<30 min, n (%)                | 3808 (72.9)   | 986 (59.7)      | <0.001 | 4303 (71.9)      | 491 (55.2)      | <0.001 |
| Habitual sleep duration (hr)              | 6.6±3.4       | 6.5±3.2         | <0.001 | 6.6±3.3          | 6.3±3.2         | <0.001 |
| Unrefreshed sleep, n (%)                  | 2738 (52.4)   | 947 (57.3)      | <0.001 | 3369 (56.3)      | 316 (35.5)      | <0.001 |
| Freq. of awakening in sleep (times/night) | 0.6±1.5       | 0.6±1.5         | 0.172  | 0.5±1.4          | 0.9±1.8         | <0.001 |
| Awakening in sleep ≥3 times/night, n (%)  | 1128 (21.6)   | 376 (22.8)      | 0.319  | 1173 (19.6)      | 331 (37.2)      | <0.001 |
| ESS                                       | 10.4±4.8      | 10.0±5.1        | 0.006  | 10.4±4.8         | 9.9±5.4         | 0.001  |
| EDS, n (%)                                | 2900 (55.5)   | 864 (52.3)      | 0.022  | 3321 (55.5)      | 443 (49.8)      | 0.001  |
| Symptom suggestive of OSA                 |               |                 |        |                  |                 |        |
| Snoring, n (%)                            | 4292 (82.2)   | 1188 (71.9)     | <0.001 | 4815 (80.5)      | 665 (74.7)      | <0.001 |
| Witnessed apnea, n (%)                    | 926 (17.7)    | 140 (8.5)       | <0.001 | 945 (15.8)       | 121 (13.6)      | 0.092  |
| Freq. of nocturia (times/night)           | 1.1±1.2       | 1.3±1.2         | <0.001 | 1±1.1            | 2±1.3           | <0.001 |
| Nocturia ≥2 times/night, n (%)            | 1695 (32.5)   | 657 (39.8)      | <0.001 | 1744 (29.1)      | 608 (68.3)      | <0.001 |

|                                     |             |            |        |             |            |        |
|-------------------------------------|-------------|------------|--------|-------------|------------|--------|
| Witnessed leg jerks in sleep, n (%) | 2458 (47.1) | 820 (49.6) | 0.0680 | 2805 (46.9) | 473 (53.1) | <0.001 |
| Morning headache, n (%)             | 484 (9.3)   | 315 (19.1) | <0.001 | 729 (12.2)  | 70 (7.9)   | <0.001 |
| Dry throat at waking up, n (%)      | 2923 (56.0) | 933 (56.5) | 0.731  | 3333 (55.7) | 523 (58.8) | 0.085  |
| AHI (/h)                            | 33.0±26.1   | 18.9±22.6  | <0.001 | 29.3±26.5   | 31.9±22.1  | <0.001 |

The demographics data were presented as mean ± SD or n (percentage).

Abbreviations: BMI, body mass index; ESS, Epworth sleepiness scale; EDS, excessive daytime sleepiness; CAD, coronary artery disease; CHF, congestive heart failure; CVA, cerebrovascular disease; COPD, chronic obstructive pulmonary disease; SOL, sleep onset latency; AHI, apnea-hypopnea index

The independent tests were analyzed by t-test and Chi-square test.

**Table S3.** Description and definition of sleep pattern parameters and OSA symptoms

| Parameter                                | Description                                                                                         | Domain                                        | Definition in SVM                                     |
|------------------------------------------|-----------------------------------------------------------------------------------------------------|-----------------------------------------------|-------------------------------------------------------|
| Habitual sleep pattern                   |                                                                                                     |                                               |                                                       |
| Habitual SOL (min)                       | During the past month, how long (in minutes) does it usually take you to fall asleep at night?      |                                               |                                                       |
| Habitual SOL <30 min                     |                                                                                                     |                                               | <30 min =1, ≥30 min = 0                               |
| Habitual sleep duration (hr)             | During the past month, how many hours of actual sleep did you get at night?                         |                                               |                                                       |
| Category of habitual sleep duration      |                                                                                                     |                                               | <6 hr = -1, 6-8 hr =0, ≥8 hr =1                       |
| Unrefreshed sleep                        | Do you feel unrefreshed after waking up in the morning?                                             | Yes, No                                       | Yes =1, No =0                                         |
| Freq. of wakening in sleep (times/night) | How many times do you wake up during the night?                                                     |                                               |                                                       |
| Awakening in sleep ≥3 times/night        |                                                                                                     |                                               | ≥3 times/night =1, <3 times/night = 0                 |
| EDS                                      |                                                                                                     |                                               | ESS ≥10 =1, ESS<10=0                                  |
| Symptom suggestive of OSA                |                                                                                                     |                                               |                                                       |
| Snoring                                  | Do you snore?                                                                                       | Ye, No, don't know                            | Yes=1, No=0, don't know=0                             |
| Witnessed apnea                          | How often in the past month have you been told to have long pauses between breaths while in sleep?  | no, <1tme/week, 1-2 times/week, ≥3 times/week | no=0, <1tme/week=0, 1-2 times/week=0, ≥3 times/week=1 |
| Freq. of nocturia (times/night)          | How many times do you need to get out of bed to go to the bathroom during your sleep period?        |                                               |                                                       |
| Nocturia ≥2 times/night                  |                                                                                                     |                                               | ≥2 times/night = 1, <2 times/night = 0                |
| Witnessed leg jerks in sleep             | How often in the past month have you been told to have had leg twitching or jerking while in sleep? | no, <1tme/week, 1-2 times/week, ≥3 times/week | no=0, <1tme/week=0, 1-2 times/week=0, ≥3 times/week=1 |
| Morning headache                         | Do you experience headaches while waking up in the morning?                                         | Yes, No                                       | Yes=1, No=0                                           |
| Dry throat at waking up                  | Do you experience dry throat at waking up?                                                          | Yes, No                                       | Yes=1, No=0                                           |

Abbreviations: ESS, Epworth sleepiness scale; EDS, excessive daytime sleepiness; OSA, obstructive sleep apnea; SOL, sleep onset latency  
The independent tests were analyzed by t-test and Chi-square test

**Table S4.** Details of SVM prediction model training and testing procedures

| Task | Task name                                     | Comment                                    | Criterion                                                    | Cutoff         | Corresponding table or figure |
|------|-----------------------------------------------|--------------------------------------------|--------------------------------------------------------------|----------------|-------------------------------|
| 1    | Data input                                    |                                            | N/A                                                          | N/A            | Table 2 and S3                |
| 2    | Data exclusion                                |                                            | PSG total recording time                                     | <240 min       | Table 1                       |
|      |                                               |                                            | Not Chinese                                                  | N/A            |                               |
|      |                                               |                                            | Any missing value in 32 features                             | N/A            |                               |
| 3    | Data splitting for 5-fold CV                  |                                            | Each fold's prevalence rate is nearly same                   | N/A            | Figure S1                     |
| 4    | First feature selection (continuous feature)  | Use 4 folds for these tasks                | Median of single-feature-SVM's AUROC                         | ≥ Median value | Table 3                       |
|      | First feature selection (categorical feature) |                                            | Median of MCC                                                | ≥ Median value | Figure 2                      |
| 5    | Forward stepwise feature selection            |                                            | AUROC                                                        | ≥ 0.8          | Figure 3, Table S5 and 4      |
| 6    | SVM optimization                              |                                            | AUROC                                                        |                |                               |
| 7    | Testing on hold out fold                      |                                            | N/A                                                          | N/A            | N/A                           |
| 8    | Averaging the results of five test folds      |                                            | N/A                                                          | N/A            | N/A                           |
| 9    | Plotting learning curve                       | To evaluate model for overfitting          | No significant difference between training and testing curve | N/A            | Figure S2                     |
| 10   | Repeating task 3-8 for five times             |                                            | N/A                                                          | N/A            | N/A                           |
| 11   | Averaging results from task 10                | Calculate mean and 95% confidence interval | N/A                                                          | N/A            | Table 5 and 6                 |



**Table S6.** The result of multivariable logistic regression.

| AHI $\geq$ 5/h |                     |         | AHI $\geq$ 15/h |                     |         | AHI $\geq$ 30/h |                     |        |
|----------------|---------------------|---------|-----------------|---------------------|---------|-----------------|---------------------|--------|
| Variable       | OR (95%CI)          | P-value | Variable        | OR (95%CI)          | P-value | OR (95%CI)      | P-value             |        |
| Snoring        | 2.732 (2.231-3.345) | <.0001  | Snoring         | 1.846 (1.543-2.208) | <.0001  | Witnessed apnea | 2.036 (1.684-2.460) | <.0001 |
| Gender         | 1.640 (1.244-2.163) | 0.0005  | Witnessed apnea | 1.873 (1.506-2.329) | <.0001  | Gender          | 1.751 (1.376-2.227) | <.0001 |
| Age            | 1.046 (1.039-1.053) | <.0001  | Dry throat      | 1.451 (1.259-1.674) | <.0001  | Snoring         | 1.471 (1.222-1.770) | <.0001 |
| Neck           | 1.081 (1.030-1.134) | 0.0014  | Gender          | 1.640 (1.301-2.066) | <.0001  | Hypertension    | 1.416 (1.202-1.667) | <.0001 |
| SOL            | 0.992 (0.988-0.996) | <.0001  | Hypnotic        | 0.635 (0.494-0.817) | 0.0004  | Dry throat      | 1.343 (1.168-1.544) | <.0001 |
| BMI            | 1.131 (1.079-1.186) | <.0001  | Age             | 1.040 (1.034-1.046) | <.0001  | Waist           | 1.013 (0.999-1.027) | <.0001 |
| Waist          | 1.029 (1.010-1.048) | 0.0026  | Waist           | 1.024 (1.009-1.039) | <.0001  | Age             | 1.028 (1.022-1.034) | <.0001 |
|                |                     |         | Neck            | 1.082 (1.043-1.122) | <.0001  | Neck            | 1.078 (1.041-1.116) | <.0001 |
|                |                     |         | SOL             | 0.991 (0.988-0.995) | <.0001  | BMI             | 1.141 (1.103-1.181) | <.0001 |
|                |                     |         | BMI             | 1.126 (1.086-1.168) | <.0001  | SOL             | 0.988 (0.984-0.992) | <.0001 |

The logistic regression was conducted with forward selection.  
 Abbreviation: BMI, body mass index; SOL, sleep onset latency

**Table S7.** Confusion matrices of different AHI cutoff points

| AHI cutoff | Prediction model |      |
|------------|------------------|------|
|            | No OSA           | OSA  |
| <5/h       | 901              | 1466 |
| ≥5/h       | 305              | 4203 |
| <15/h      | 1831             | 1045 |
| ≥15/h      | 833              | 3166 |
| <30/h      | 2871             | 830  |
| ≥30/h      | 1213             | 1961 |

**Figure S1.** Illustration of procedures of the 5-fold cross validation (CV). First, the whole dataset was separated into 5 folds randomly. Second, in the first iteration, fold 5 was an isolated testing fold, and fold 1-4 were the training folds for feature selection and model optimization. Third, after 5 iterations, the CV result is the average of the testing results from all iterations.

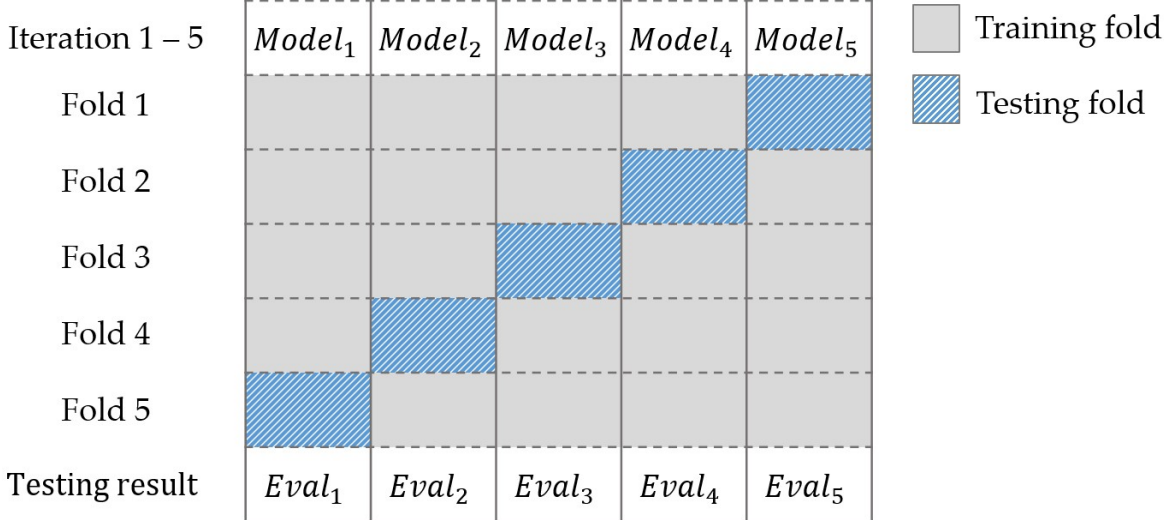

$$CV \text{ result of 5 testing fold} = \frac{(Eval_1 + Eval_2 + Eval_3 + Eval_4 + Eval_5)}{5}$$

**Figure S2.** Learning curve of the prediction model with two, six, and six features for prediction of  $AHI \geq 5/h$ ,  $\geq 15/h$ , and  $\geq 30/h$ . The red line indicates the training score and the green line indicates the cross-validation score. The colored area represents the 95% confidence interval (CI). The training and testing curves showed similar results and they converged in the end. The 95% CI also showed the convergence of training and testing curves as the training data increased.

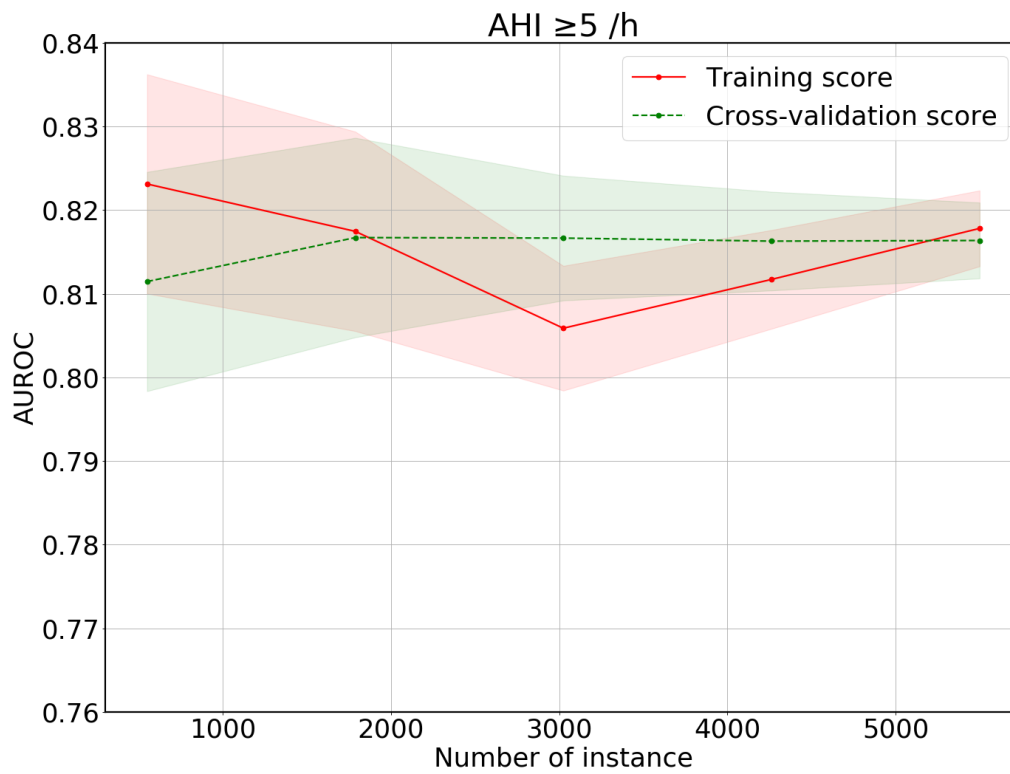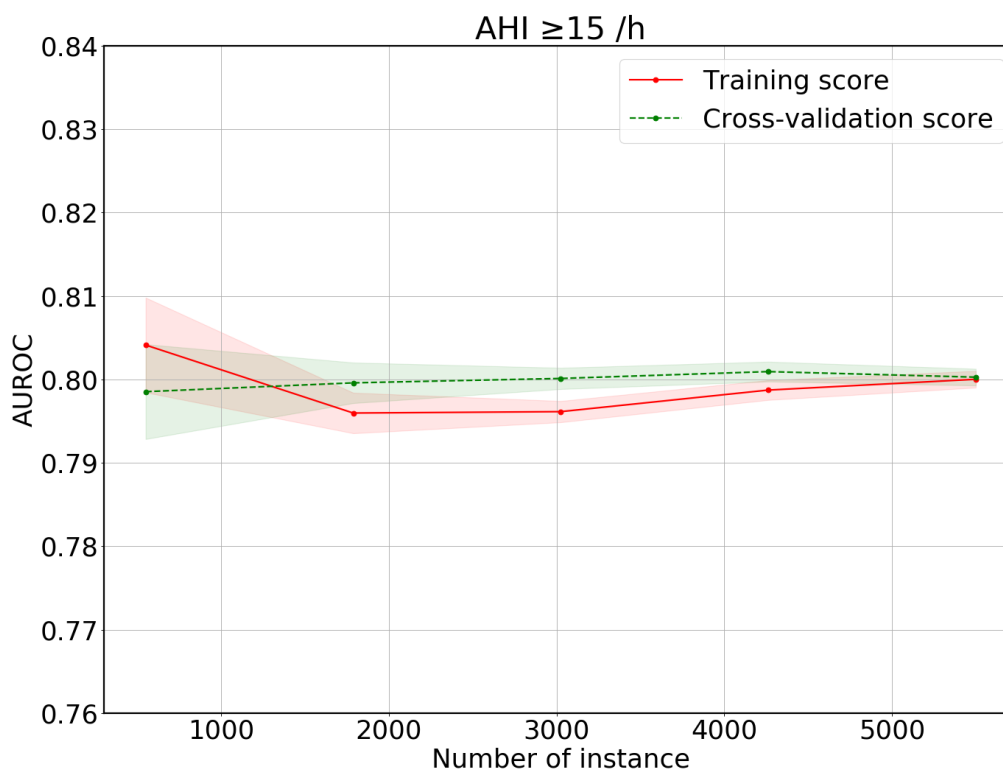

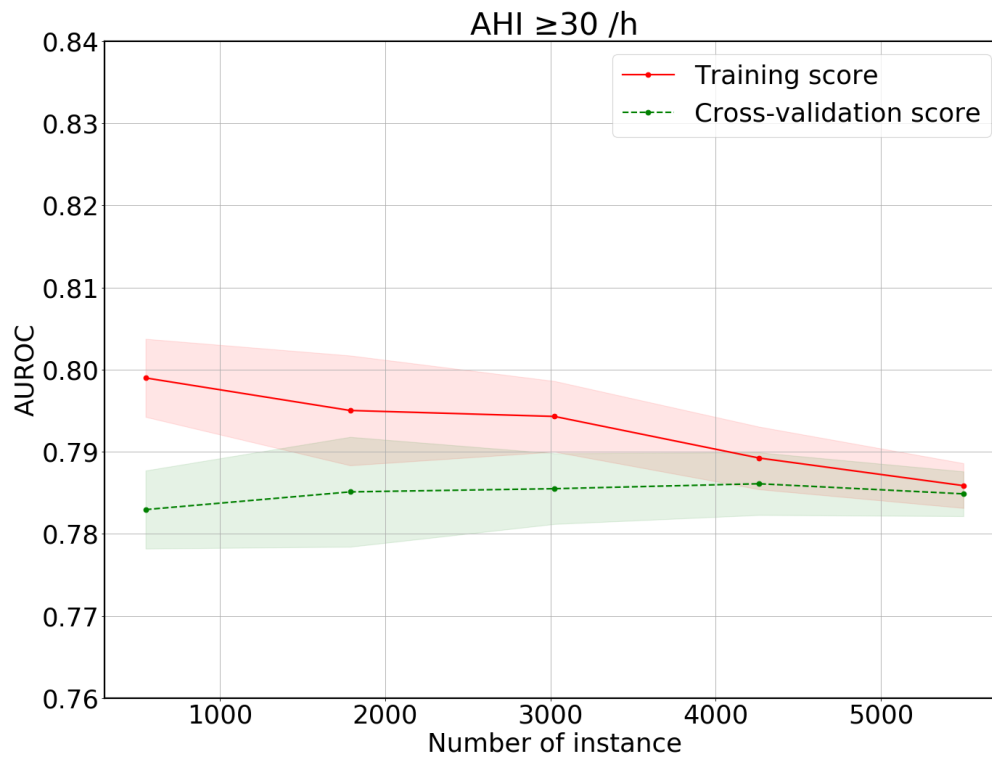

## References

1. Kirby, S.D.; Eng, P.; Danter, W.; George, C.F.; Francovic, T.; Ruby, R.R.; Ferguson, K.A. Neural network prediction of obstructive sleep apnea from clinical criteria. *Chest* **1999**, *116*, 409-415.
2. Rowley, J.A.; Aboussouan, L.S.; Badr, M.S. The use of clinical prediction formulas in the evaluation of obstructive sleep apnea. *Sleep* **2000**, *23*, 929-938.
3. Rodsutti, J.; Hensley, M.; Thakkinian, A.; D'Este, C.; Attia, J. A clinical decision rule to prioritize polysomnography in patients with suspected sleep apnea. *Sleep* **2004**, *27*, 694-699.
4. Sharma, S.K.; Malik, V.; Vasudev, C.; Banga, A.; Mohan, A.; Handa, K.K.; Mukhopadhyay, S. Prediction of obstructive sleep apnea in patients presenting to a tertiary care center. *Sleep & breathing = Schlaf & Atmung* **2006**, *10*, 147-154.
5. Takegami, M.; Hayashino, Y.; Chin, K.; Sokejima, S.; Kadotani, H.; Akashiba, T.; Kimura, H.; Ohi, M.; Fukuhara, S. Simple four-variable screening tool for identification of patients with sleep-disordered breathing. *Sleep* **2009**, *32*, 939-948.
6. Caffo, B.; Diener-West, M.; Punjabi, N.M.; Samet, J. A novel approach to prediction of mild obstructive sleep disordered breathing in a population-based sample: The sleep heart health study. *Sleep* **2010**, *33*, 1641-1648.
7. Bouloukaki, I.; Kapsimalis, F.; Mermigkis, C.; Kryger, M.; Tzanakis, N.; Panagou, P.; Moniaki, V.; Vlachaki, E.M.; Varouchakis, G.; Siafakas, N.M., *et al.* Prediction of obstructive sleep apnea syndrome in a large greek population. *Sleep & breathing = Schlaf & Atmung* **2011**, *15*, 657-664.
8. Zou, J.; Guan, J.; Yi, H.; Meng, L.; Xiong, Y.; Tang, X.; Su, K.; Yin, S. An effective model for screening obstructive sleep apnea: A large-scale diagnostic study. *PLOS ONE* **2013**, *8*, e80704.
9. Marti-Soler, H.; Hirotsu, C.; Marques-Vidal, P.; Vollenweider, P.; Waeber, G.; Preisig, M.; Tafti, M.; Tufik, S.B.; Bittencourt, L.; Tufik, S., *et al.* The nosas score for screening of sleep-disordered breathing: A derivation and validation study. *The Lancet. Respiratory medicine* **2016**, *4*, 742-748.
10. Shah, N.; Hanna, D.B.; Teng, Y.; Sotres-Alvarez, D.; Hall, M.; Loreda, J.S.; Zee, P.; Kim, M.; Yaggi, H.K.; Redline, S., *et al.* Sex-specific prediction models for sleep apnea from the hispanic community health study/study of latinos. *Chest* **2016**, *149*, 1409-1418.
11. Ustun, B.; Westover, M.B.; Rudin, C.; Bianchi, M.T. Clinical prediction models for sleep apnea: The importance of medical history over symptoms. *Journal of clinical sleep medicine : JCSM : official publication of the American Academy of Sleep Medicine* **2016**, *12*, 161-168.
12. Liu, W.T.; Wu, H.T.; Juang, J.N.; Wisniewski, A.; Lee, H.C.; Wu, D.; Lo, Y.L. Prediction of the severity of obstructive sleep apnea by anthropometric features via support vector machine. *PLoS One* **2017**, *12*, e0176991.
13. Shin, C.H.; Grabitz, S.D.; Timm, F.P.; Mueller, N.; Chhangani, K.; Ladha, K.; Devine, S.; Kurth, T.; Eikermann, M. Development and validation of a score for preoperative prediction of obstructive sleep apnea (sposa) and its perioperative outcomes. *BMC anesthesiology* **2017**, *17*, 71-71.

14. Tan, A.; Hong, Y.; Tan, L.W.L.; van Dam, R.M.; Cheung, Y.Y.; Lee, C.H. Validation of nosas score for screening of sleep-disordered breathing in a multiethnic asian population. *Sleep & breathing = Schlaf & Atmung* **2017**, *21*, 1033-1038.
15. Traxdorf, M.; Tziridis, K.; Scherl, C.; Iro, H.; Haferkamp, J. The erlangen questionnaire: A new 5-item screening tool for obstructive sleep apnea in a sleep clinic population - a prospective, double blinded study. *European review for medical and pharmacological sciences* **2017**, *21*, 3690-3698.
16. Duarte, R.L.M.; Rabahi, M.F.; Magalhães-da-Silveira, F.J.; de Oliveira-E-Sá, T.S.; Mello, F.C.Q.; Gozal, D. Simplifying the screening of obstructive sleep apnea with a 2-item model, no-apnea: A cross-sectional study. *Journal of clinical sleep medicine : JCSM : official publication of the American Academy of Sleep Medicine* **2018**, *14*, 1097-1107.
